# Supplementary material
Source: Springer Nature journal article supplement (https://www.springermedizin.de/resource/supplementary/13058_2012_3226_MOESM1_ESM.pdf/9703538)

Panel A: Homogenous staining,

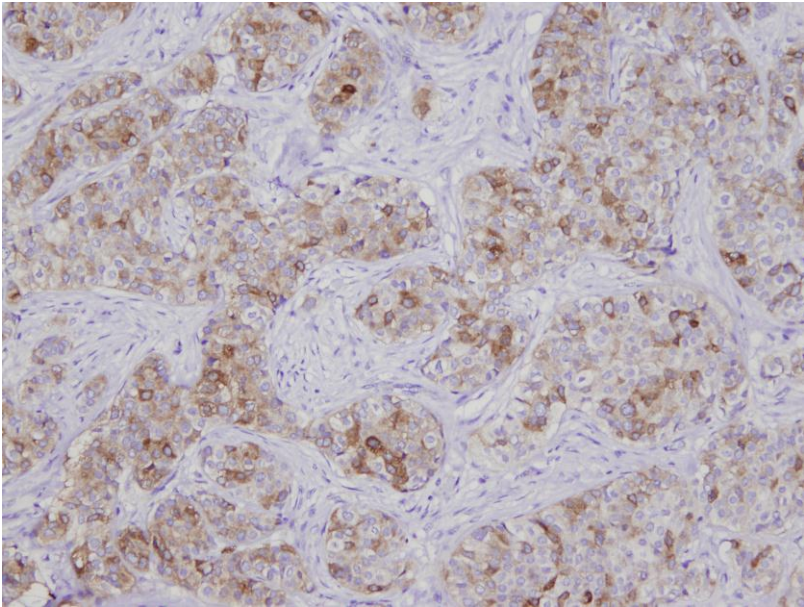

Panel B: Heterogeneous staining.

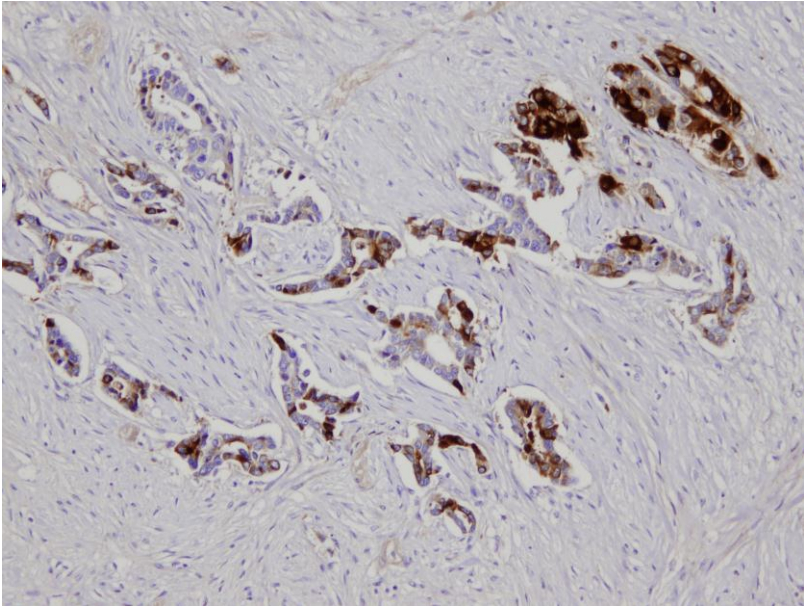

Supplement: MOESM1 [file 9703538]
